# Supplementary material
Source: Royal Society of Chemistry journal article supplement (https://www.rsc.org/suppdata/cc/1999/205/808126c.doc)
Supplement: Supplementary file 1 [file 808126c.doc]

Summary of MO calculations and NBO analysis for **1** and **2***a*

|  | | **1** | | | | | | | | **2** | | | | | |
| --- | --- | --- | --- | --- | --- | --- | --- | --- | --- | --- | --- | --- | --- | --- | --- |
| X | | *d*Se···O*b* | *E*tot*c* | *E*del*d* | | *q*A*e*  (*q*B) | *q*B*e*  (*q*B) | nO ® *SeX*g* | | *d*Se···O*b* | *E*tot*c* | *E*del*d* | *q*A *f*  (*q*B) | *q*B *f*  (*q*B) | nO ® *SeX*g* |
| **a**  **b**  **c**  **d’**  **e’**  **f** | Cl  Br  CN  SMe  SeMe  Me | 2.58  2.62  2.71  2.80  2.82  2.86 | –9.99  –8.19  –7.09  –4.76  –3.86  –3.05 | 16.6  15.1  10.2  8.2  7.9  6.1 |  | –0.640  (–0.025)  –0.635  (–0.020)  –0.629  (–0.014)  –0.621  (–0.006)  –0.618  (–0.003)  –0.615  (–0.000) | –0.606  (+0.009)  –0.606  (+0.009)  –0.602  (+0.013)  –0.613  (+0.002)  –0.614  (+0.001)  –0.617  (–0.002) | 12.2  10.9  5.8  4.2  4.1  3.0 |  | 2.82  2.94  2.94  3.07  3.14  3.17 | –2.55  –1.24  –2.14  –0.75  –1.20  –0.44 | 6.8  4.7  4.7  2.9  2.6  1.9 | –0.812  (–0.008)  –0.810  (–0.006)  –0.811  (–0.007)  –0.806  (–0.002)  –0.807  (–0.003)  –0.805  (–0.001) | –0.808  (–0.004)  –0.808  (–0.004)  –0.806  (–0.002)  –0.809  (–0.005)  –0.807  (–0.003)  –0.809  (–0.005) | 5.7  3.7  3.7  1.9  1.7  1.2 |

*a* Geometry optimization and NBO analysis were performed at the RHF/6-31G(d,p) level with Huzinaga's 43321/4321/321(d) basis set for Se and Br (Gaussian 94 and NBO ver. 4.0). Energies are in kcal mol–1 and charges are in electron. *b* Nonbonded distance between Se and O (Å). *c* Relative total electronic energy between conformer **A** and **B** calculated at B3LYP/6-31G(d,p) with the Huzinaga basis for Se and Br. *d* NBO deletion energy calculated with the Se···O interaction being deleted. *e* Natural population at oxygen atom for conformer **A** or **B** calculated with natural population analysis. Numbers in parentheses are relative population with respect to the oxygen atom of PhCHO. *f* Natural population at oxygen atom for conformer **A** or **B** calculated with natural population analysis. Numbers in parenthesis are relative population with respect to the oxygen atom of PhCH2OH. *g* Major interaction energy between oxygen lone pair (nO) and ***SeX *anti*-bonding orbital obtained with NBO second-order perturbation analysis (kcal mol–1).
